# Supplementary material
Source: PubMed Central journal article supplement (PMC10506158)

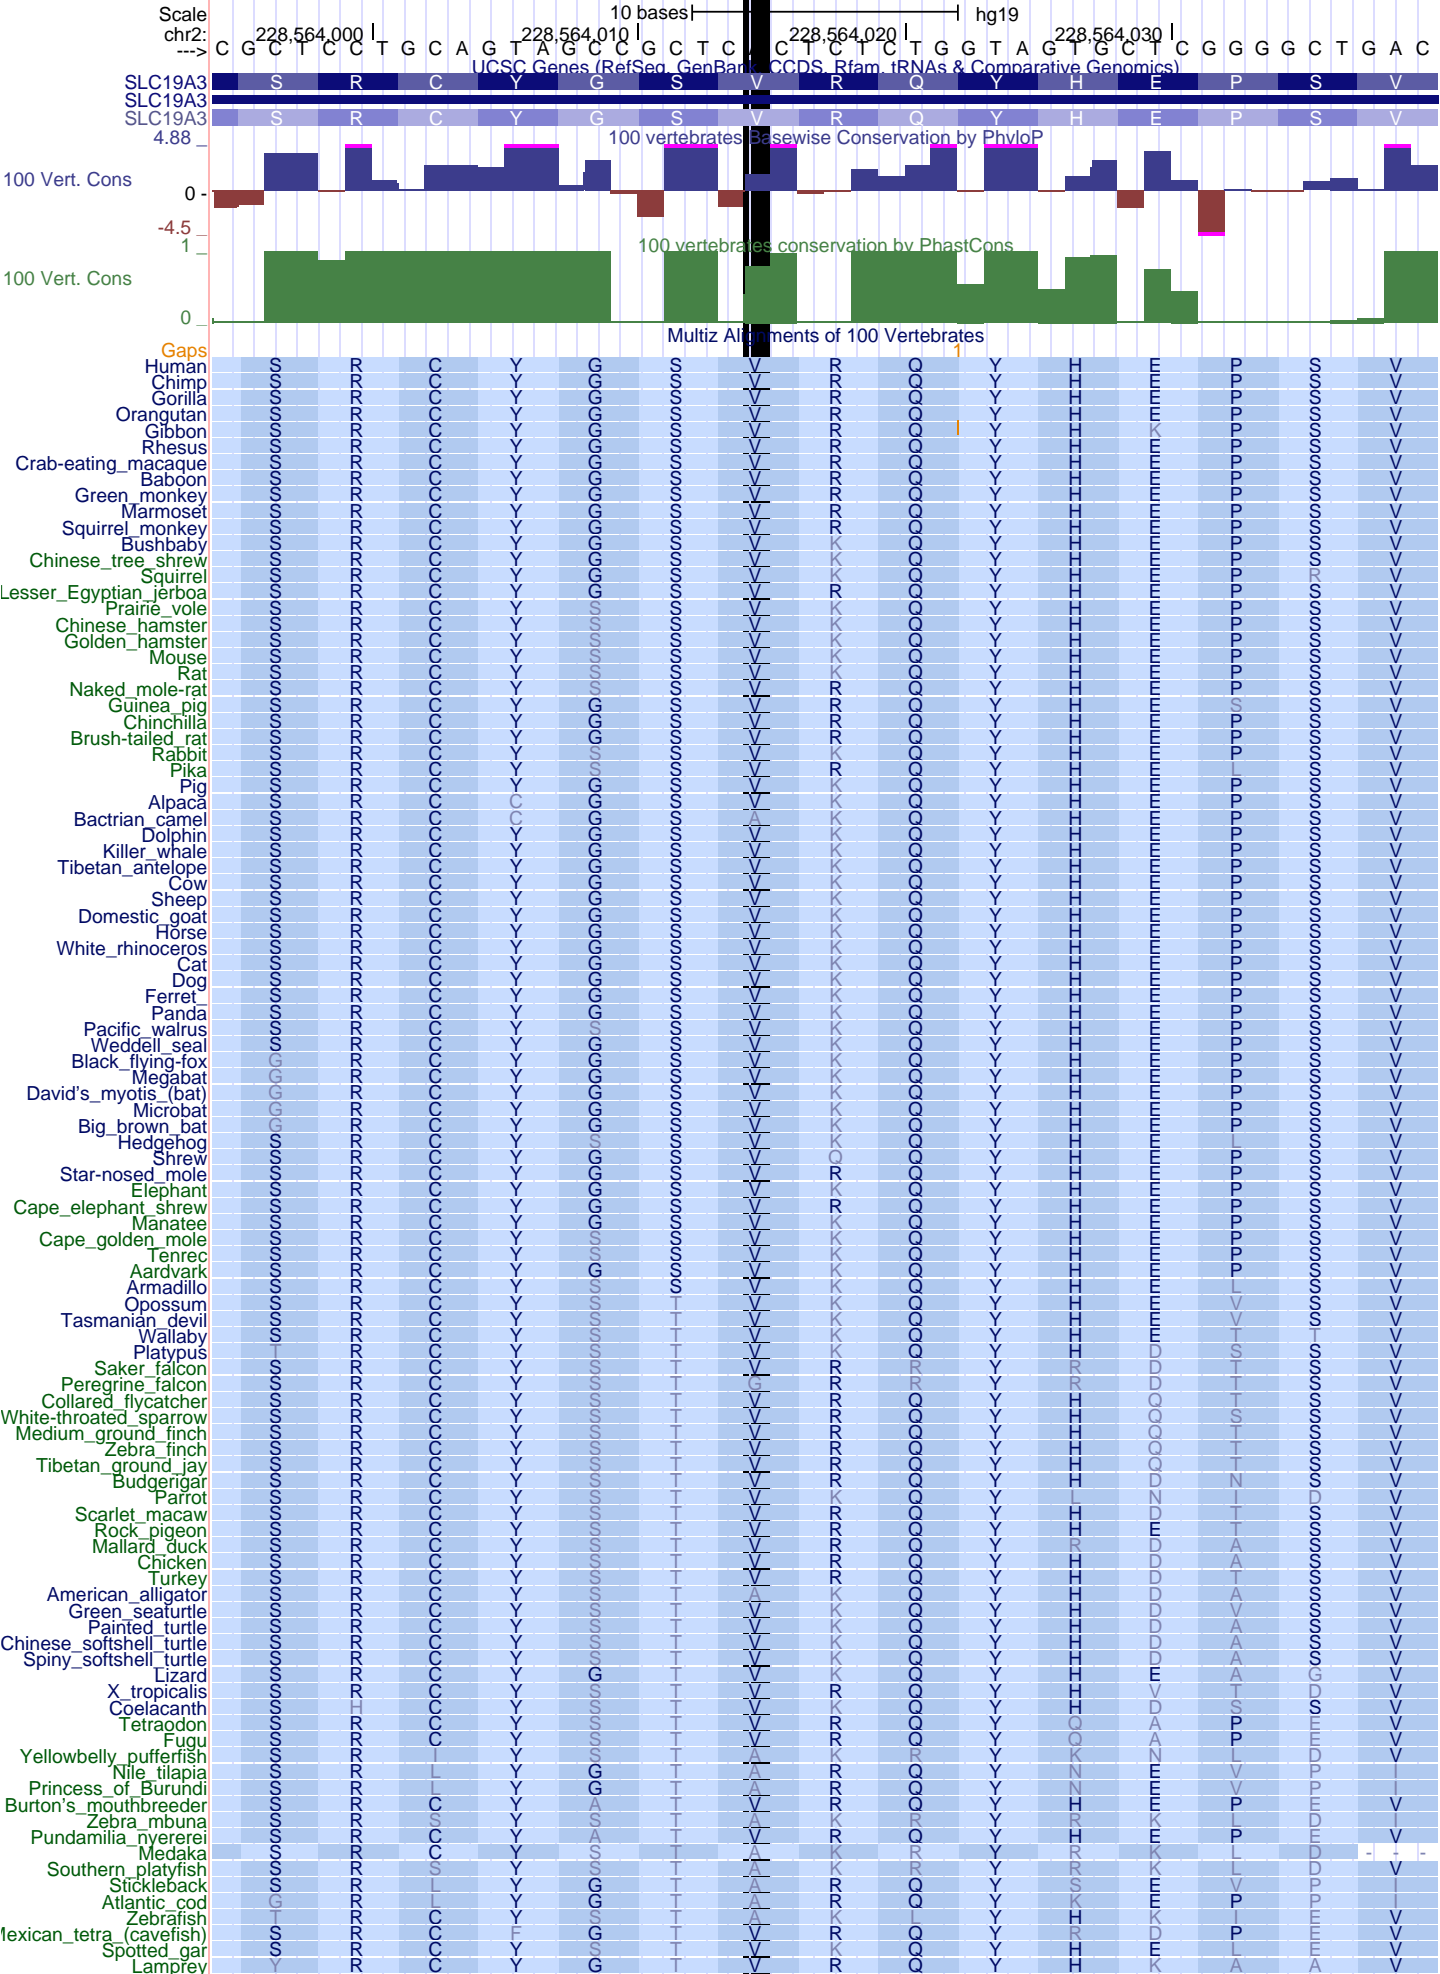

Supplement: NIHMS1930211-supplement-Supinfo1.pdf [file NIHMS1930211-supplement-Supinfo1.pdf]
